# Supplementary material
Source: publisher site journal article supplement (https://www.dovepress.com/article/570370)
Supplement: Supplementary file 1 [file 570370_combined%20Checklist%20and%20Questionnaire.docx]

**Supplementary File 1**

STROBE Statement—Checklist of items that should be included in reports of ***cohort studies***

|  | **Item No** | **Recommendation** | **Page No** |
| --- | --- | --- | --- |
| **Title and abstract** | 1 | (*a*) Indicate the study’s design with a commonly used term in the title or the abstract | 1 |
| (*b*) Provide in the abstract an informative and balanced summary of what was done and what was found | 3-4 |
| **Introduction** | | | |
| Background/rationale | 2 | Explain the scientific background and rationale for the investigation being reported | 7 |
| Objectives | 3 | State specific objectives, including any prespecified hypotheses | 8 |
| **Methods** | | | |
| Study design | 4 | Present key elements of study design early in the paper | 9 |
| Setting | 5 | Describe the setting, locations, and relevant dates, including periods of recruitment, exposure, follow-up, and data collection | 10 |
| Participants | 6 | (*a*) Give the eligibility criteria, and the sources and methods of selection of participants. Describe methods of follow-up | 11-13 |
| (*b*)For matched studies, give matching criteria and number of exposed and unexposed | 11-13 |
| Variables | 7 | Clearly define all outcomes, exposures, predictors, potential confounders, and effect modifiers. Give diagnostic criteria, if applicable | 12-13 |
| Data sources/ measurement | 8* | For each variable of interest, give sources of data and details of methods of assessment (measurement). Describe comparability of assessment methods if there is more than one group | 13 |
| Bias | 9 | Describe any efforts to address potential sources of bias | 13 |
| Study size | 10 | Explain how the study size was arrived at |  |
| Quantitative variables | 11 | Explain how quantitative variables were handled in the analyses. If applicable, describe which groupings were chosen and why | 11-13 |
| Statistical methods | 12 | (*a*) Describe all statistical methods, including those used to control for confounding | 13 |
| (*b*) Describe any methods used to examine subgroups and interactions | 13 |
| (*c*) Explain how missing data were addressed | 13 |
| (*d*) If applicable, explain how loss to follow-up was addressed | 14 |
| (*e*) Describe any sensitivity analyses | 14 |
| **Results** | | |  |
| Participants | 13* | (a) Report numbers of individuals at each stage of study—eg numbers potentially eligible, examined for eligibility, confirmed eligible, included in the study, completing follow-up, and analysed | 14-18 |
| (b) Give reasons for non-participation at each stage | 14-18 |
| (c) Consider use of a flow diagram | 14-18 |
| Descriptive data | 14* | (a) Give characteristics of study participants (eg demographic, clinical, social) and information on exposures and potential confounders | 14-18 |
| (b) Indicate number of participants with missing data for each variable of interest | 14-18 |
| (c) Summarise follow-up time (eg, average and total amount) | 14-18 |
| Outcome data | 15* | Report numbers of outcome events or summary measures over time | 14-18 |

| Main results | 16 | (*a*) Give unadjusted estimates and, if applicable, confounder-adjusted estimates and their precision (eg, 95% confidence interval). Make clear which confounders were adjusted for and why they were included | 14-18 |
| --- | --- | --- | --- |
| (*b*) Report category boundaries when continuous variables were categorized | 14-18 |
| (*c*) If relevant, consider translating estimates of relative risk into absolute risk for a meaningful time period | 14-18 |
| Other analyses | 17 | Report other analyses done—eg analyses of subgroups and interactions, and sensitivity analyses | 14-18 |
| **Discussion** | | | |
| Key results | 18 | Summarise key results with reference to study objectives | 19 |
| Limitations | 19 | Discuss limitations of the study, taking into account sources of potential bias or imprecision. Discuss both direction and magnitude of any potential bias | 22-23 |
| Interpretation | 20 | Give a cautious overall interpretation of results considering objectives, limitations, multiplicity of analyses, results from similar studies, and other relevant evidence | 19-23 |
| Generalisability | 21 | Discuss the generalisability (external validity) of the study results | 19-23 |
| **Other information** | | | |
| Funding | 22 | Give the source of funding and the role of the funders for the present study and, if applicable, for the original study on which the present article is based | 23 |

*Give information separately for exposed and unexposed groups.

**Note:** An Explanation and Elaboration article discusses each checklist item and gives methodological background and published examples of transparent reporting. The STROBE checklist is best used in conjunction with this article (freely available on the Web sites of PLoS Medicine at http://www.plosmedicine.org/, Annals of Internal Medicine at http://www.annals.org/, and Epidemiology at http://www.epidem.com/). Information on the STROBE Initiative is available at http://www.strobe-statement.org.

**Supplementary File 2**

**Pregnant women’ Attitudes and Perceptions Towards Non-Medically Indicated Caesarean Sections in Thailand: An Implementation Study**

**INSTRUCTIONS**

**1. This questionnaire is under the research project “Pregnant women’ Attitudes and Perceptions Towards Non-Medically Indicated Caesarean Sections in Thailand: An Implementation Study”.**

**2. The questionnaire consists of 4 sections:**

**1) Section 1 is the general information of the respondents.**

**2) Section 2 is the attitude questionnaire on “Non-medically indicated Caesarean Section”.**

**3) Section 3 is the perception questionnaire on “Non-medically indicated Caesarean Section”.**

**4) Section 4 is the opinion questionnaire on “Non-medically indicated Caesarean Section”.**

**PART 1 GENERAL INFORMATION OF THE RESPONDENT**

1. Age .................. years
2. Weight ................................. kilograms; Height ................... centimeters
3. Religion
   1. Buddhist 🞎 Muslim 🞎 Christian 🞎 Other (specify)...................................
4. Marital status
   1. Couple 🞎 Divorced 🞎 Husband deceased 🞎 Other (specify) ..................................
5. Highest level of education
   1. Primary 🞎 Lower secondary
   2. Higher secondary/Vocational certificate 🞎Associate’s degree/Higher vocational certificate
   3. Bachelor’s degree 🞎 Master’s/doctoral degree
6. Occupation
   1. Housewife 🞎 Civil servant 🞎 State enterprise 🞎 Employed
   2. Private business 🞎 Private 🞎 Other (specify)................
7. Family income (per month) approximately
   1. 🞎 < 10,000 baht 🞎 10,000-<30,000 baht
   2. 30,000-<50,000 baht 🞎 50,000-100,000 baht
   3. More than 100,000 baht
8. Medical treatment rights
   1. 🞎Direct payment 🞎 Social Security
   2. 🞎 Universal Health insurance 🞎Self-pay
   3. Other (specify) .................................................
9. Method of pregnancy
   1. 🞎 Natural 🞎 In vitro fertilization (ICSI) 🞎 In vitro fertilization (IVF)
   2. 🞎 Insemination (IUI) 🞎 Other (specify).......................
10. Chronic diseases
    1. Diabetes 🞎 High blood pressure 🞎 Heart disease 🞎 Lung disease
    2. Others, specify.......
11. Are you currently pregnant for the
    1. 🞎 1 🞎 2 🞎3 🞎4 times or more
12. **How many times have you had a miscarriage?**
    1. 🞎 **No miscarriage** 🞎 **1** 🞎 **2** 🞎**3 times or more**
13. **Did you have difficulty conceiving?**
    1. 🞎 **Yes** 🞎 **No** 🞎 **Not sure**

**Instructions: Please read the following statements one by one, considering how much each statement describes your thoughts. Then, please mark  in the blank space at the end of the statement that most closely matches your thoughts.**

**PART 2 ATTITUDE QUESTIONNAIRE ON “NON-MEDICALLY INDICATED CAESAREAN SECTION”**

| Information | Strongly agree | Agree | Uncertain | Disagree | Strongly disagree |
| --- | --- | --- | --- | --- | --- |
| **Attitudes toward caesarean section without indication** | | | | | |
| 1. Do you think caesarean section without indication is safe? |  |  |  |  |  |
| 1. Do you think that caesarean section without indication is possible and normal? |  |  |  |  |  |
| 1. Infertility is an important factor in deciding to undergo a caesarean section. |  |  |  |  |  |
| 1. The maternal age has an effect on the decision to undergo a caesarean section. |  |  |  |  |  |
| 1. Do you think that if you have an abnormal condition during pregnancy, such as diabetes or high blood pressure, you will decide to request a caesarean section? |  |  |  |  |  |
| 1. Do you think the birth date of your child is important to you and your family? |  |  |  |  |  |
| 1. Do you think that vaginal birth will cause problems with the vagina, which affects urination and defecation? |  |  |  |  |  |
| 1. Do you think that vaginal birth will cause problems with vaginal intercourse? |  |  |  |  |  |
| 1. Do you think that caesarean section is less painful than vaginal delivery? |  |  |  |  |  |
| 1. Do you think that children born by caesarean section are healthier and safer than those born vaginally? |  |  |  |  |  |
| 1. Caesarean section planning allows for better planning of leave from work and arranging for childcare. |  |  |  |  |  |
| 1. Frequent internal examinations during delivery are a reason for choosing a caesarean section. |  |  |  |  |  |
| 1. Social media influences the decision to undergo a caesarean section. |  |  |  |  |  |
| 1. Caesarean section should be performed only when advised by a doctor. |  |  |  |  |  |
| 1. Caesarean section recovery is as fast as natural birth |  |  |  |  |  |
| 1. Caesarean section allows the baby to breastfeed normally as soon as possible. |  |  |  |  |  |
| 1. The doctor is an important person in deciding to perform a caesarean section. |  |  |  |  |  |
| 1. If my husband was present in the delivery room, I would decide to have a natural birth. |  |  |  |  |  |
| 1. The cost of caesarean section is a barrier to deciding to have a caesarean section. |  |  |  |  |  |
| 1. You will change doctors or transfer to another hospital if your doctor refuses to perform a caesarean section for you. |  |  |  |  |  |

**PART 3: SURVEY ON THE PERCEPTION OF “NON-MEDICALLY INDICATED CAESAREAN SECTION”**

1. Did you know that the caesarean section rate in Thailand and around the world has increased dramatically?

□ Yes

□ No

□ Uncertain

2. Which birth method did you decide to use first?

□ Caesarean section

□ Spontaneous vaginal delivery

□ Uncertain

3. If your doctor recommends a caesarean section, how would you decide?

□ Follow your doctor's advice.

□ Uncertain

□ Rejection

If you refuse, please provide a reason (you can choose more than one). □ No indication for surgery □ Afraid of pain from the surgical wound

□ High cost □ Afraid of harm to the child

□ Afraid the child will not receive microorganisms from natural birth □ Other, please specify..................................................................................

4. The people who influenced your decision to undergo a caesarean section were (you can select more than one)

□ Doctor

□ Husband

□ Parents

□ Close friend

□ Social media

□ Astrologer

□ No-one influences the decision, it is a personal decision only

□ Consult another person (specify...............................

5. How important do you think the auspicious time for childbirth is?

□ Very great □ Great □ Moderate □ Little □ Not important

6. How do you know about complications from caesarean section compared to natural birth? (You can choose more than 1)

□ A caesarean section will cause slower recovery than normal

□ A caesarean section will delay breastfeeding

□ A caesarean section is at risk of more blood loss than normal.

□ A caesarean section may cause injury to the adjacent organs.

□ A caesarean section may cause more adhesions in the abdominal cavity than normal.

□ A caesarean section may cause deeper or more persistent placenta previa in subsequent pregnancies.

□ A caesarean section may deprive the baby of good bacteria from the birth canal

□ A caesarean section may cause abnormal breathing of the baby

□ Other, please specify.....................................................................................

**PART 4: SURVEY ON OPINIONS ABOUT “NON-MEDICALLY INDICATED CAESAREAN SECTION”**

Deciding on a caesarean section This is a hypothetical situation only.

1. If your doctor recommends a caesarean section, you will follow his/her advice.

□ Yes □ No □ Uncertain

1. You trust and are confident in your doctor's advice on delivery methods.

□ Yes □ No □ Uncertain

1. Caesarean section according to the auspicious time is important to you

□ Yes □ No □ Uncertain

1. Caesarean section is safer than natural birth

□ Yes □ No □ Uncertain

1. You choose a caesarean section because you can schedule and plan your leave in advance

□ Yes □ No □ Uncertain

1. You choose a caesarean section because you don't want to have to be assessed frequently by the doctor while waiting for delivery

□ Yes □ No □ Uncertain

1. You choose a caesarean section because you are concerned about the dangers or injury to your birth canal

□ Yes □ No □ Uncertain

1. You chose a caesarean section because of a social media recommendation

□ Yes □ No □ Uncertain

1. You know that the cost of a caesarean section is higher than a normal birth

□ Yes □ No □ Uncertain

1. You have no problem with the cost of caesarean section

□ Yes □ No □ Uncertain

1. The pain during natural birth made you decide to have a caesarean section

□ Yes □ No □ Uncertain

1. Epidural block for pain relief makes you decide to choose natural birth instead of caesarean section

□ Yes □ No □ Uncertain

1. Distance between home and hospital is an important factor in choosing a caesarean section

□ Yes □ No □ Uncertain

1. If your husband is present in the delivery room, you will be able to decide to have a natural birth instead of a caesarean section

□ Yes □ No □ Uncertain

| Information | Strongly agree | Agree | Uncertain | Disagree | Strongly disagree |
| --- | --- | --- | --- | --- | --- |
| 1. I know that a caesarean section can cause more complications than a normal birth |  |  |  |  |  |
| 1. I know that a caesarean section can deprive my baby of good bacteria from the birth canal |  |  |  |  |  |
| 1. I know that a caesarean section can cause more blood loss than normal |  |  |  |  |  |
| 1. I know that a caesarean section can delay my ability to breastfeed |  |  |  |  |  |
| 1. I know that a caesarean section can cause placenta previa in subsequent pregnancies |  |  |  |  |  |
| 1. I have sufficient support from my family members to have a caesarean section |  |  |  |  |  |
| 1. I decided to have a caesarean section because I wanted an auspicious time |  |  |  |  |  |
| 1. I decided to have a caesarean section because my family wanted me to |  |  |  |  |  |
| 1. I felt pressured by my doctor to have a caesarean section |  |  |  |  |  |
| 1. I felt pressured by my family members to have a caesarean section |  |  |  |  |  |
| 1. I made my decision without any pressure from anyone else |  |  |  |  |  |
| 1. I know that caesarean section should be done when indicated |  |  |  |  |  |
| 1. I know that caesarean section has risks and impacts on me and my newborn |  |  |  |  |  |
| 1. I have received sufficient support from others in my decision to have a caesarean section |  |  |  |  |  |
| 1. I can make the decision to have a caesarean section without hesitation |  |  |  |  |  |
| 1. I feel that the cost of caesarean section is my problem |  |  |  |  |  |
| 1. I feel that if a third party helps me with advice about caesarean section, I will be able to make the decision to have a caesarean section more easily. |  |  |  |  |  |
| 1. The epidural block during labour is an important part of deciding to have a natural birth |  |  |  |  |  |
| 1. The doctor's advice is the most important thing in deciding to have a caesarean section |  |  |  |  |  |
| 1. If my husband is with me in the delivery room, I will choose a natural birth |  |  |  |  |  |

Other recommendations regarding a non-medically indicated caesarean section

1. ...............................................................................................................................................
2. ...............................................................................................................................................
3. ...............................................................................................................................................
4. ...............................................................................................................................................
5. ...............................................................................................................................................
